# Supplementary material
Source: Springer Nature journal article supplement (http://www.springermedizin.de/resource/supplementary/12958_2009_545_MOESM4_ESM.pdf/9568272)

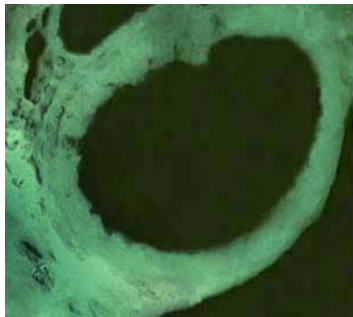

**10×10**

**A**

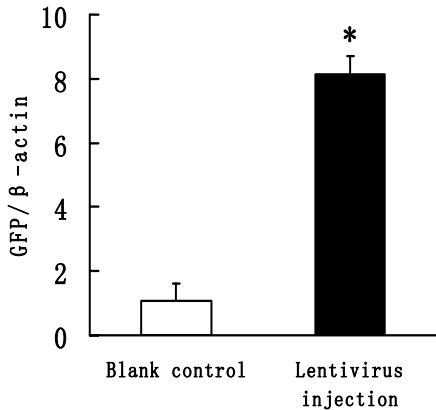

**B**

Supplement: MOESM4 [file 9568272]
